# Supplementary material for: Fetal Sex: Preferences and Predictions During Pregnancy: a cross-sectional study
Source: Research Square preprint supplement (doi:10.21203/rs.3.rs-6239126/v1), 2025-05-08
Supplement: Supplementary file 1 [file 63bc1b5660ecb107a2f07864.docx]

Table 1. Demographic and lifestyle characteristics of the study participants, including age, body mass index, education status, marital status, parental smoking status, and nutrition according to two genders

|  | **Girl (n=138) (n%)** | **Boy (n=158) (n%)** | **p-value** |
| --- | --- | --- | --- |
| **Age** | 32.5±4.97(Mean ± Standard Deviation) | 32.3±4.22 (Mean ± Standard Deviation) | 0.736 |
| **Body mass index** | 22.8 (20.7-27.1)  (Median (25.-75.percentile)) | 23 (21.1-26)  (Median (25.-75.percentile)) | 0.962 |
| **Education** | | | |
| Elementary education | 2 (1.4%) | 4 (2.5%) | 0.324 |
| Intermediate school | 24 (17.5%) | 18 (11.4%) |
| Higher education (Abitur) | 14 (10.1%) | 11 (7%) |
| Community/Municipal college | 46 (33.3%) | 53 (33.5%) |
| University | 52 (37.7%) | 72 (45.6%) |
| **Marital Status** | | | |
| Single | 1 (0.7%) | 2 (1.3%) | 0.301 |
| Single in a relationship | 36 (26.1%) | 53 (33.5%) |
| Married | 96 (69.6%) | 101(63.9%) |
| Divorced | 5 (3.6%) | 2(1.3%) |
| **Previous Pregnancy** | | | |
| Yes | 68 (49.3%) | 69 (43.7%) | 0.335 |
| No | 70 (50.7 %) | 89 (56.3%) |
| **Planned Pregnancy** | | | |
| Yes | 116 (84.1%) | 133 (84.2%) | 0.978 |
| No | 22 (15.9%) | 25 (15.8%) |

***Table 1 continued***

|  | | **Girl (n=138) (n%)** | **Boy (n=158) (n%)** | **p-value** |
| --- | --- | --- | --- | --- |
| **Maternal smoking status** | | | |
| Yes | 9 (6.5%) | 14 (8.9%) | 0.408 |
| No | 129 (93.5%) | 144 (91.1%) |
| **Paternal smoking status** | | | |
| Yes | 40 (25.3%) | 36 (26.1%) | 0.88 |
| No | 102 (73.9%) | 118 (74.7%) |
| **Nutrition** | | | |
| Standard | 134 (97.1%) | 143 (90.5%) | 0.021 |
| Vegan or Vegetarian | 4 (2.9%) | 15 (9.5%) |
| **Duration of conception** | | | |
| <3 Month | 67 (48.6%) | 82 (51.9%) | 0.408 |
| 3-6 Month | 29 (21.0%) | 41 (25.9%) |
| 6-12 Month | 14 (10.1%) | 11 (7.0%) |
| >1 Year | 28 (20.3%) | 24 (15.2%) |
| **Try for a specific gender** | | | |
| Yes | 72 (63.7%) | 81 (58.7%) | 0.417 |
| No | 41 (36.3%) | 57 (41.3%) |
| **Assisted Reproduction Techniques** | | | |
| No | 105 (76.1%) | 130 (82.2%) | 0.173 |
| Cycle monitoring | 10 (7.2%) | 11 (7.0%) |
| Ovulation stimulation | 8 (5.8%) | 2 (1.3%) |
| In Vitro Fertilization | 15 (10.9%) | 15 (9.5%) |
