# Supplementary material for: Fetal Sex: Preferences and Predictions During Pregnancy: a cross-sectional study
Source: Research Square preprint supplement (doi:10.21203/rs.3.rs-6239126/v1), 2025-05-08
Supplement: Supplementary file 2 [file a4d372d24466ad9b60176939.docx]

Fetal sex: maternal influencing factors and their influence on physical and psychological changes in pregnancy

Part 1: Questions about yourself and your pregnancy

Age:_____ Height:_____ m Weight before pregnancy _____ kg

# 1. Where were you born?

## ☐ Germany

## ☐ Europe

## ☐ Middle East

## ☐ Asia

## ☐ Eastern Europe

## ☐ Russia☐ Australia

## ☐ North America

## ☐ Middle America

## ☐ South America

## ☐ Other: _________

# 2. Where did you grow up?

#

## ☐ Germany

## ☐ Europe

## ☐ Middle East

## ☐ Asia

## ☐ Eastern Europe

## ☐ Russia

## ☐ Australia

## ☐ North America

## ☐ Middle America

## ☐ South America

## ☐ Other: _______

# 3. What is your highest level of education?

## ☐ none

## ☐ Primary school

## ☐ Secondary school

## ☐ High school diploma

## ☐ Community collage

## ☐ University

# 4. Marital status:

## ☐ single, living alone

## ☐ single, in a relationship

## ☐ married

## ☐ divorced/separated

# 5. If you already have children, you have...

## ☐ Boys, how many: _____

## ☐ Girls, how many: _____

## ☐ no children

# 6. Was your current pregnancy planned?

## ☐ yes

## ☐ no

# 7. Do you feel that it's a...

## ☐ Girl

## ☐ Boy

## ☐ no idea

# 8. Why do you think it will be a boy or a girl? (multiple answers possible)

## ☐ I feel it ☐ I hope so ☐ From "experience" of a previous

## pregnancy

## ☐ I dreamed it

## ☐ I was told by relatives/friends

## ☐ I have no idea what it will be

## ☐ Other: ____________________

# 9. How confident are you in your prediction?

☐ verycertain

☐ fairly certain

☐ uncertain

☐ not at all certain

## **10. Would you prefer a boy or a girl?**

## ☐ Girl

## ☐ Boys

## ☐ no preference

**11. Does the father of the child have a feeling whether it will be a girl or a boy?**

☐ no

☐ yes, he thinks it's a girl

☐ yes, he thinks it's a boy

**12. Would your partner prefer a girl or a boy?**

☐ Girls

☐ Boys

☐ no preference

Part 2: Questions about your lifestyle and habits

**13. During your current pregnancy, how many times a week do you do sport or exercise? (at least 30 minutes at a time and during which you get out of breath/sweat)**

## ☐ 1-2x

## ☐ 3-4x

## ☐ 5-7x

☐ from time to time, less often than 1x weekly

## ☐ not at all

**14. Before your current pregnancy, how many times a week did you do sport or exercise? (at least 30 minutes at a time and during which you got out of breath/sweat)**

## ☐ 1-2x

## ☐ 3-4x

## ☐ 5-7x

☐ from time to time, less often than 1x weekly

## ☐ not at all

# 15. What sport do you currently do regularly? (Multiple answers possible)

## ☐ Jogging/running

## ☐ Hiking

## ☐ Spinning/Cycling

## ☐ Aerobics

## ☐ Tennis

## ☐ Football/Handball/Basketball

**16. What kind of sport did you do regularly before you became pregnant? (multiple answers possible)**

## ☐ Jogging/running

## ☐ Hiking

## ☐ Spinning/Cycling

## ☐ Aerobics

## ☐ Tennis

## ☐ Football/Handball/Basketball ☐ Yoga

## ☐ Pilates

## ☐ Muscle training

## ☐ No

## ☐ other: ________

#

**17. Are you a vegetarian or vegan?**

☐ Yes, vegetarian

☐ Yes, vegan

☐ no

**18. Did you smoke before you became pregnant?**

☐ no

☐ yes: _____ cigarettes/day, for _____ years

**19. Are you currently smoking during pregnancy?**

☐ no

☐ at the beginning, but stopped from the ___ week of pregnancy

☐ yes, but reduced: from ___ to ___ /day

☐ yes, unchanged: ___ cigarettes/day

##

Part 3. Questions about your sexual behavior

# 20. How long have you been trying to get pregnant?

## ☐ <3 Months

## ☐ 3-6 months

## ☐ 6-12 months

## ☐ >1 year

# 21. Have you had fertility treatment?

##

## ☐ Cycle monitoring

## ☐ Ovulation induction

## ☐ ICSI

## ☐ IVF

## ☐ no

**22. How often have you had sexual intercourse during your current pregnancy?**

☐ not at all

☐ less than 1x/week

☐ 1-3x/week

☐ more than 3x/week

☐ I don't want to answer

**23. How often did you have sex before you became pregnant?**

☐ not at all

☐ only at the time of ovulation

☐ less than 1x/week

☐ 1-3x/week

☐ more than 3x/week

☐ I don't want to answer

#

# 24. Have you heard of the theory that you can influence the sex of your child by the time you have intercourse during the month?

## ☐ yes

## ☐ no (continue with question 24)

# 24.1. Did you try this specifically?

## ☐ yes

## ☐ no

## ☐ I don't want to answer

# 24.2. Have you ever had sexual intercourse on purpose?

☐ before ovulation

☐ at the time of ovulation

☐ after ovulation

☐ I don't want to answer

##

Part 4. Questions about your medical history

# 25. Do you have one or more of the following illnesses?

## ☐ Premenstrual Syndrome

## ☐ Diabetes Type I

## ☐ Diabetes Type II

## ☐ Endometriosis

##

## ☐ Hypothyroidism

## ☐ Hyperthyroidism

## ☐ Depression

## ☐ Polycystic ovary syndrome

## **26. Do you suffer from any other chronic disease?**

## ☐ no

## ☐ Yes, namely: __________________________________________________________________________________________________________________________________________________________________

## **27. Do you take any medication regularly?**

## ☐ no

## ☐ yes, and that is (name, dosage, since when): ___________________________________________________________________________________________________________________________________________________________________________________________________________________________________________________

# 28. Have you always had regular periods?

## ☐ yes, always

## ☐ yes, mostly

## ☐ no, rarely

## ☐ no, never

# 29. Your cycle length in days before you become pregnant: _________ days

# 30. Does your partner smoke?

##

## ☐ no

## ☐ yes: _____ cigarettes/day, for _____ years

Part 5: Questions about pregnancy changes

**What has changed for you so far in this pregnancy?**

Please rate the following questions compared to how you felt before you became pregnant

Severe nausea:

☐ yes, until what week: ____

☐ no

Sleep quality:

☐ improved

☐ deteriorated

☐ unchanged

Energy level:

☐ more

☐ exhausted

☐ energetic

☐ unchanged

Concentration:

☐ better

☐ worse

☐ unchanged

Skin texture:

☐ pure

☐ impure

☐ unchanged

Hair:

☐ drier

☐ smoother

☐ unchanged

Body hair:

☐ increased

☐ decreased

☐ unchanged

Infections that have occurred:

☐ Urinary infection

☐ Lung infection

☐ Gastrointestinal infection

☐ Otitis

☐ Vaginal infection

Mood changes:

☐ greatly increased

☐ increased

☐ less than usual

☐ unchanged

Defecation:

☐ more constipation

☐ rather more diarrhea

☐ no change

Hair loss:

☐ significantly increased

☐ significantly less

☐ no change

Did you have vaginal bleeding in early pregnancy?

☐ yes, in what week: ___

☐ no

☐ I don't know

Do you have more cold feet during this pregnancy?

☐ yes

☐ no

☐ unchanged

Do you have more headaches during this pregnancy?

☐ yes
☐ no

☐ unchanged

Appetite:

☐ increased

☐ lost weight

☐ unchanged

Did you have an increased appetite during this pregnancy?

☐ sweets

☐ Salty

☐unchanged

How did the shape of your belly change?

☐ rather pointed

☐ rather round

☐ no assessment

Edema

☐ significantly more

☐ significantly less

☐ no change

Vaginal discharge:

☐ significantly increased

☐ removed, dry vagina

☐ no change

Breasts:

☐ greatly enlarged

☐ painful feeling of tension

☐ no change

Libido (sexual desire):

☐ Increased

☐ decreased

☐ unchanged

☐ I don't want to answer

Part 6: Previous Pregnancies

*Please answer any questions regarding your previous pregnancies. If you can't remember, just skip the question.*

**Pregnancy: ____** *(e.g. first, second...)*

**Year of pregnancy: _____**

**Child gender:**

☐ Girl ☐Boy

**What changed during pregnancy at that time:**

Severe nausea:

☐ yes, until what week: ____

☐ no

Sleep quality:

☐ improved

☐ deteriorated

☐ unchanged

Energy level:

☐ more

☐ exhausted

☐ energetic

☐ unchanged

Concentration:

☐ better

☐ worse

☐ unchanged

Skin texture:

☐ pure

☐ impure

☐ unchanged

Hair:

☐ drier

☐ smoother

☐ unchanged

Body hair:

☐ increased

☐ decreased

☐ unchanged

Infections that have occurred:

☐ Urinary infection

☐ Lung infection

☐ Gastrointestinal infection

☐ Otitis

☐ Vaginal infection

Mood changes:

☐ greatly increased

☐ increased

☐ less than usual

☐ unchanged

☐ not at all

Defecation:

☐ more constipation

☐ rather more diarrhea

☐ no change

Hair loss:

☐ significantly increased

☐ significantly less

☐ no change

Did you have vaginal bleeding in early pregnancy?

☐ yes, in which week: ___

☐ no

Did you have more cold feet during pregnancy? ☐ yes

☐ no

☐ unchanged

Did you suffer more from headaches during pregnancy?

☐ yes

☐ no

☐ unchanged

Appetite:

☐ increased

☐ lost weight

☐ unchanged

Did you have an increased appetite during this pregnancy?

☐ sweets

☐ salty

☐ unchanged

How did the shape of your belly change?
☐ rather pointed

☐ rather round

☐ no assessment

Edema

☐ significantly more

☐ significantly less

☐ no change

Vaginal discharge:

☐ significantly increased

☐ removed, dry vagina

☐ no change

Breasts:

☐ greatly enlarged

☐ painful feeling of tension

☐ no change

How often did you have sex before you became pregnant?

☐ less than 1x/week

☐ 1-3x/week

☐ more than 3x/week

☐ only at the time of ovulation

☐ I don't want to answer

How often did you have sex during your pregnancy?

☐ less than 1x/week

☐ 1-3x/week

☐ more than 3x/week

☐ only at the time of ovulation

☐ Not at all

☐ I don't want to answer

Libido (sexual desire):

☐ increased

☐ decreased

☐ unchanged

☐ I don't want to answer
